# Supplementary material for: Resemblances of experiment and theory on aryl substituted luminogenic polypyrazolines
Source: Royal Society of Chemistry journal article supplement (doi:10.1039/c9nj01221d), 2019-01-01
Supplement: c9nj01221d1.pdf [file c9nj01221d1.pdf]

## Electronic Supporting Information

### Resemblances of experiment and theory on aryl substituted luminogenic polypyrazolines

Tirumalachetty Vandana<sup>a</sup>, Arumugam Karuppusamy<sup>a</sup>, Rasu Arulkumar<sup>b</sup>,

Ponnambalam Venuvanalingam<sup>\*b</sup> and Palaninathan Kannan<sup>\*a</sup>

#### Table of Content

**Figure S1.** <sup>1</sup>H-NMR spectrum of **PPB**.

**Figure S2.** <sup>1</sup>H-NMR spectrum of **PPA**.

**Figure S3.** <sup>1</sup>H-NMR spectrum of **PPT**.

**Figure S4.** <sup>1</sup>H-NMR spectrum of **PPBt**.

**Figure S5.** Absorption spectra of PPB, PPA, PPT and PPBt in various solvents

**Figure S6.** Ground state optimized structures of the monomer units calculated at B3LYP/6-311+G(d,p) level in CHCl<sub>3</sub> medium. (H atoms has been omitted for clarity)

**Table S1.** Thermal properties of polymers.

**Table S2.** Selected dihedral angles (degree) of designed monomeric compounds of PLEDs. S<sub>0</sub> geometries had been optimized both in gas phase and CHCl<sub>3</sub> medium at B3LYP/6-311+G (d, p) level. S<sub>1</sub> and T<sub>1</sub> geometries are optimized using TDA method. The atom numbers are given in the Fig.S6.

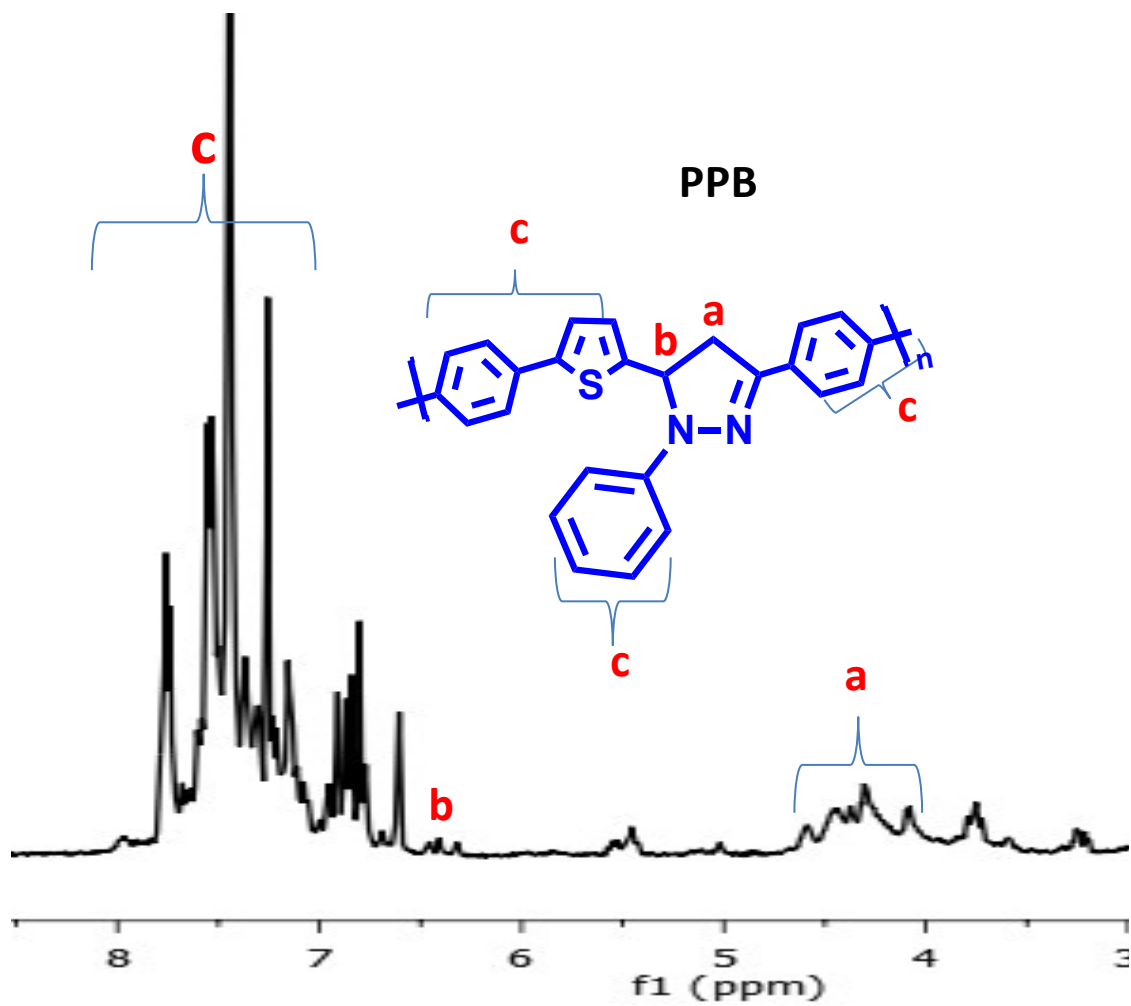

**FigureS1.** <sup>1</sup>H-NMR spectrum of **PPB**.

**PPB** : <sup>1</sup>H NMR(400 MHz, CDCl<sub>3</sub>) δ (ppm) 7.89-7.10(m, 15H, Ar-H), 6.9-6.8 (t, 1H, pyrazoline CH), 4.4 -4.2 (m, 2H, pyrazoline CH<sub>2</sub>).

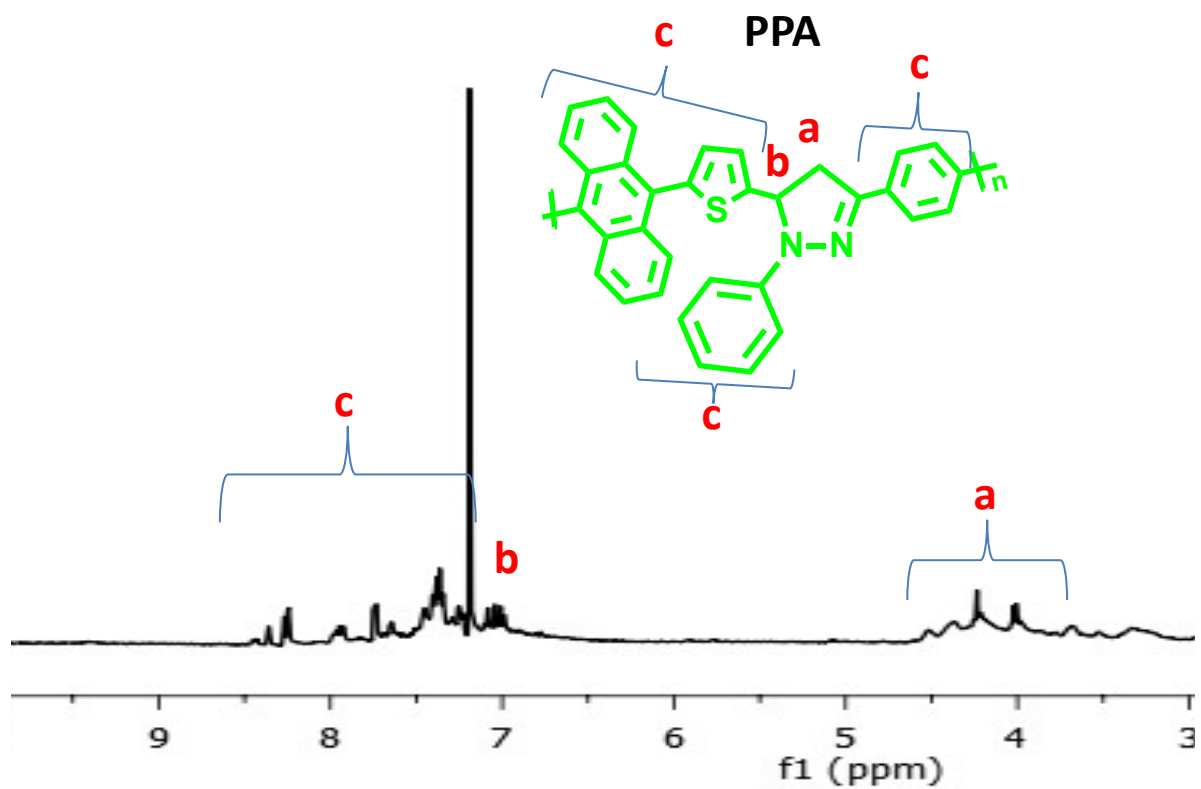

**FigureS2.** <sup>1</sup>H-NMR spectrum of PPA.

**PPA:** <sup>1</sup>H NMR(400 MHz, CDCl<sub>3</sub>) δ (ppm) 7.89-7.10(m, 19H, Ar-H), 6.9-6.8 (t, 1H, pyrazoline CH), 4.4 -4.2 (m, 2H, pyrazoline CH<sub>2</sub>).

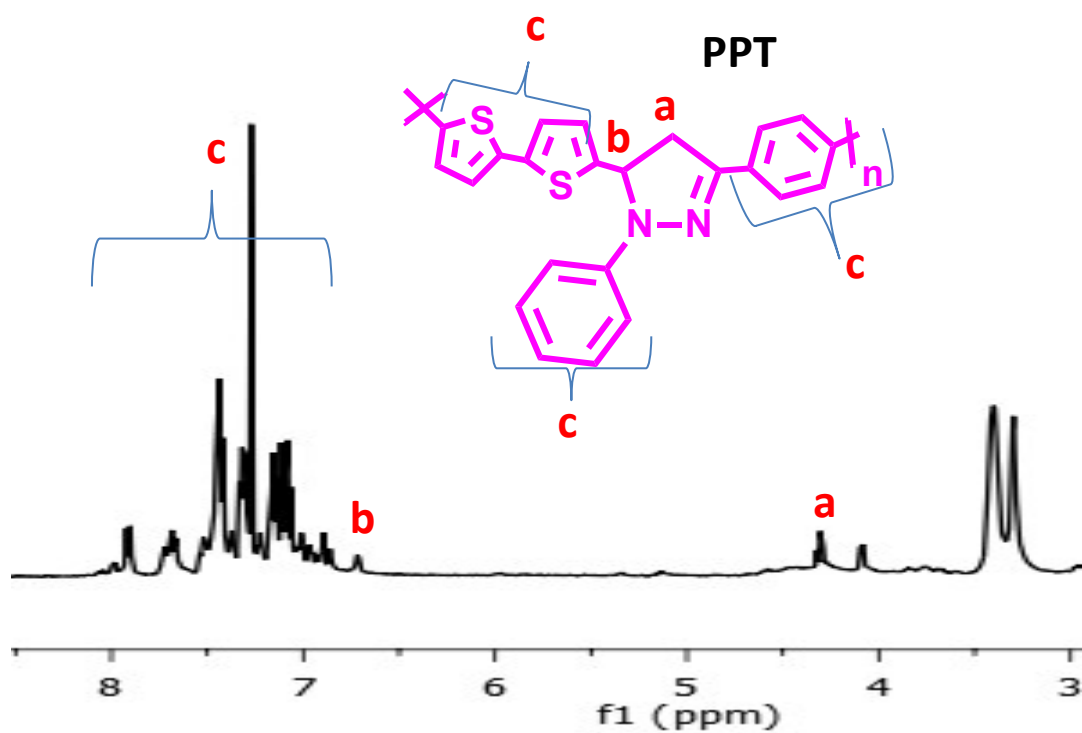

**FigureS3.** <sup>1</sup>H-NMR spectrum of PPT.

**PPT:** <sup>1</sup>H NMR(400 MHz, CDCl<sub>3</sub>) δ (ppm) 7.89-7.10(m, 13H, Ar-H), 6.9-6.8 (t, 1H, pyrazoline CH), 4.4 -4.2 (m, 2H, pyrazoline CH<sub>2</sub>).

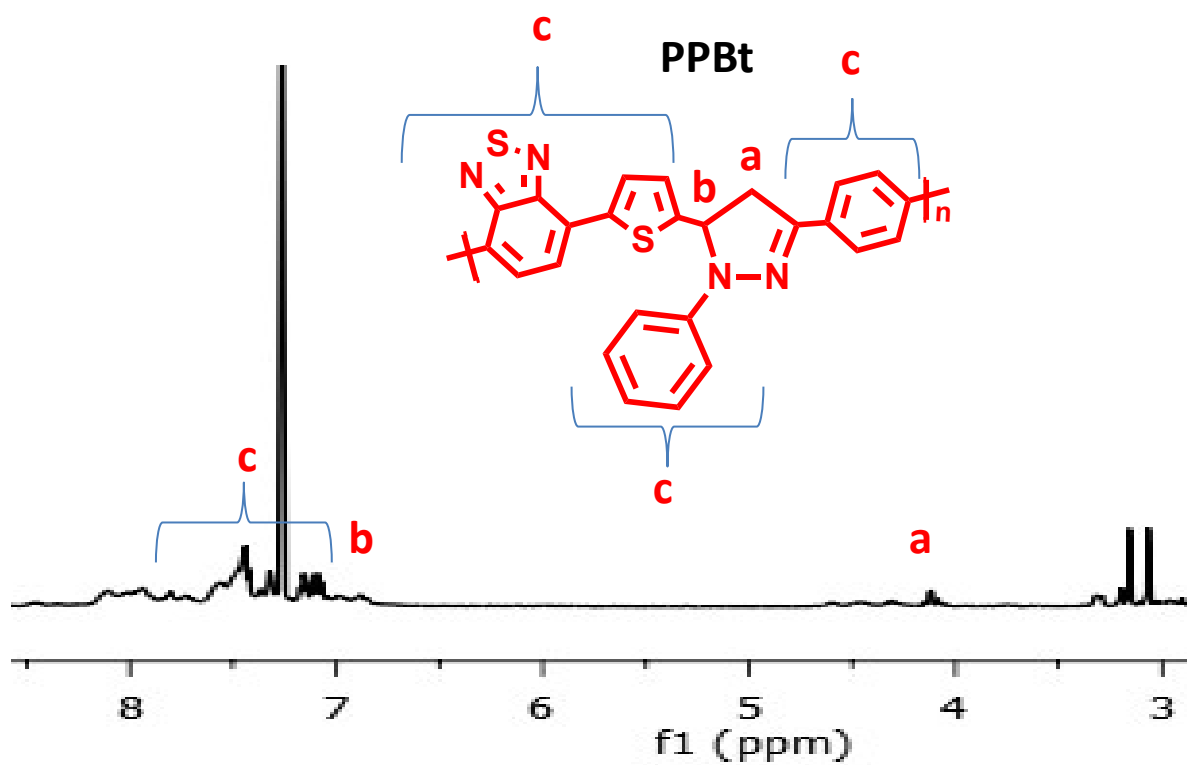

**FigureS4.** <sup>1</sup>H-NMR spectrum of PPBt.

**PPBt:** <sup>1</sup>H NMR(400 MHZ, CDCl<sub>3</sub>) δ (ppm) 7.89-7.10(m, 13H, Ar-H), 6.9-6.8 (t, 1H, pyrazoline CH), 4.4 -4.2 (m, 2H, pyrazoline CH<sub>2</sub>).

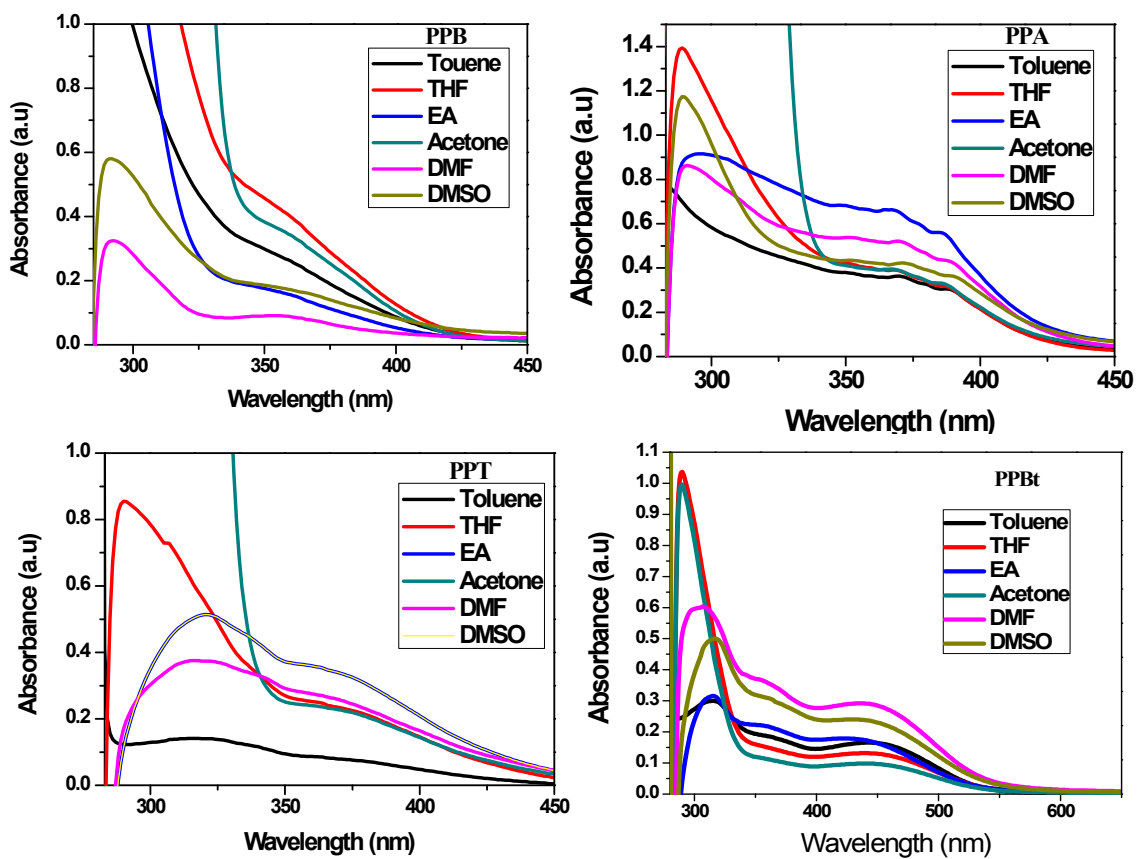

FigureS5. Absorption spectra of PPB, PPA, PPT and PPBt in various solvents

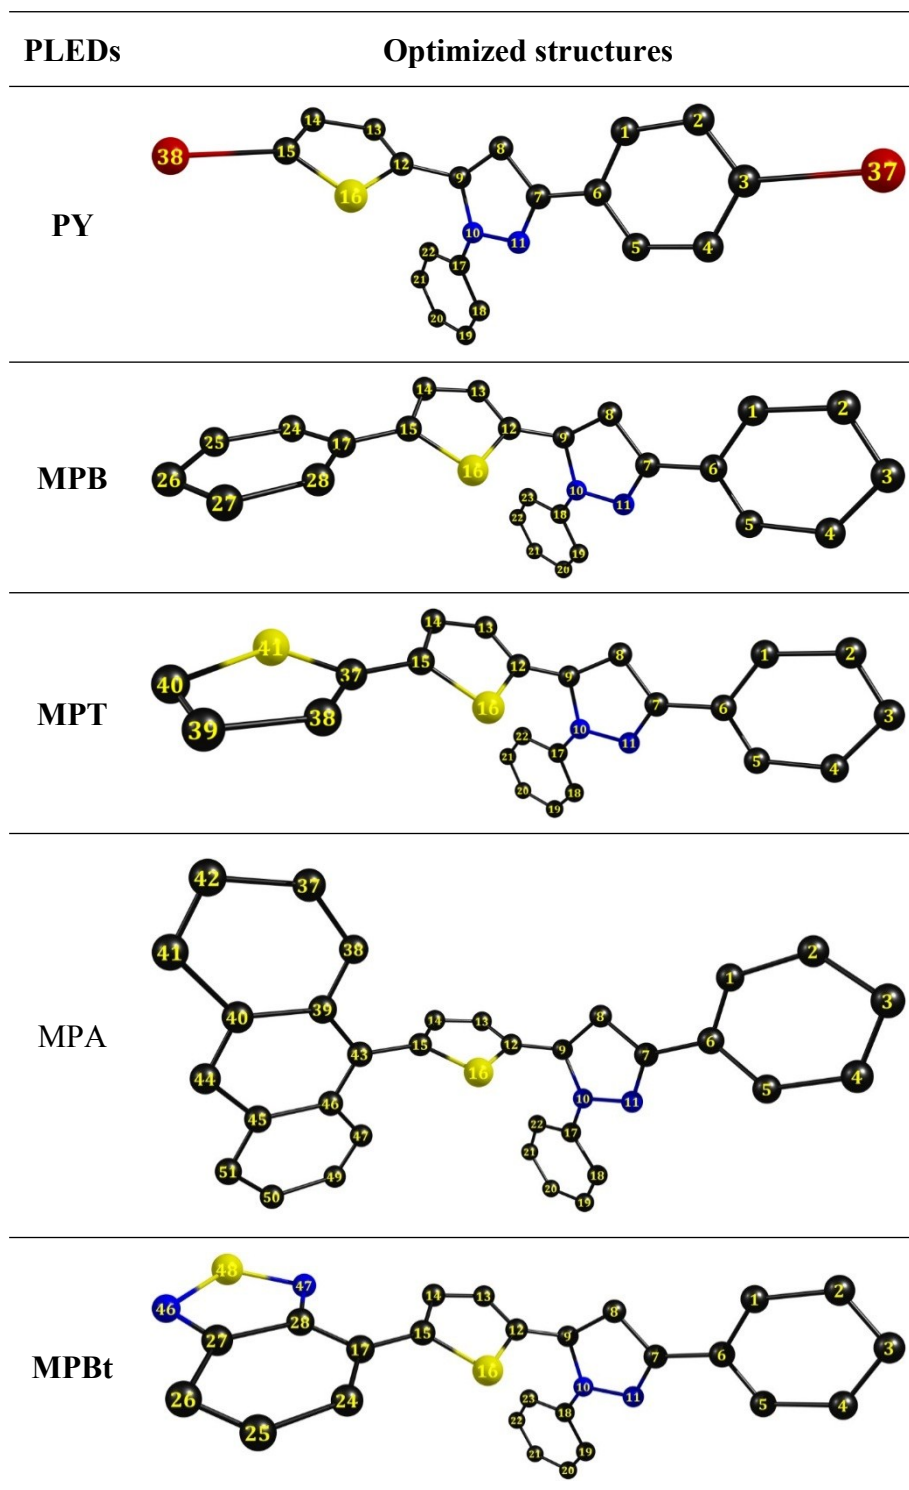

**Figure S6.** Ground state optimized structures of the monomer units calculated at B3LYP/ 6-311+G(d,p) level in  $\text{CHCl}_3$  medium. (H atoms has been omitted for clarity)

**Table S1.** Thermal properties of polymers.

| <b>Material</b> | <b>T<sub>g</sub>/T<sub>m</sub><br/>(°C)</b> | <b>T<sub>5%</sub><br/>(°C)</b> | <b>T<sub>50%</sub><br/>(°C)</b> | <b>T<sub>d max</sub><br/>(°C)</b> |
|-----------------|---------------------------------------------|--------------------------------|---------------------------------|-----------------------------------|
| <b>PPB</b>      | 75                                          | 282                            | 401                             | 658                               |
| <b>PPA</b>      | 111                                         | 300                            | 408                             | 516                               |
| <b>PPT</b>      | 113                                         | 310                            | 422                             | 530                               |
| <b>PPBt</b>     | 127/158                                     | 311                            | 390                             | 558                               |



**Table S2.** Selected dihedral angles (degree) of designed monomeric units of PLEDs.  $S_0$  geometries had been optimised both in gas phase and  $\text{CHCl}_3$  medium at B3LYP/6-311+G (d, p) level.  $S_1$  and  $T_1$  geometries are optimized using TDA method. The atom numbers are given in the Fig.S6.

| Model PLEDs | Dihedral Angle               | $S_0$     |                 | TDA     |         |
|-------------|------------------------------|-----------|-----------------|---------|---------|
|             |                              | Gas Phase | $\text{CHCl}_3$ | $S_1^*$ | $T_1^*$ |
| PY          | 16S-12C-9C-10N ( $\phi_a$ )  | 37.3      | 37.7            | 57.8    | 51.0    |
| MPB         | 16S-12C-9C-10N ( $\phi_a$ )  | 38.3      | 39.2            | 60.8    | 49.3    |
|             | 24C-17C-15C-16S ( $\phi_b$ ) | -150.0    | -151.8          | -178.6  | -151.8  |
| MPT         | 16S-12C-9C-10N ( $\phi_a$ )  | 38.2      | 38.6            | 61.3    | 41.7    |
|             | 41S-37C-15C-16S ( $\phi_b$ ) | -154.0    | -155.5          | -178.6  | -180.0  |
| MPA         | 16S-12C-9C-10N ( $\phi_a$ )  | 41.6      | 41.8            | 52.9    | 40.5    |
|             | 39C-43C-15C-16S ( $\phi_b$ ) | 97.4      | 95.6            | 89.4    | 117.1   |
| MPBt        | 16S-12C-9C-10N ( $\phi_a$ )  | 37.9      | 38.2            | 54.9    | 35.7    |
|             | 28C-17C-15C-16S ( $\phi_b$ ) | -173.1    | -171.7          | -176.8  | -179.7  |
